# Supplementary figures and images for: The Ddc2/ATRIP checkpoint protein monitors meiotic recombination intermediates
Source: Oxford University Press journal article supplement (doi:10.1242/jcs.081711), 2011-06-22

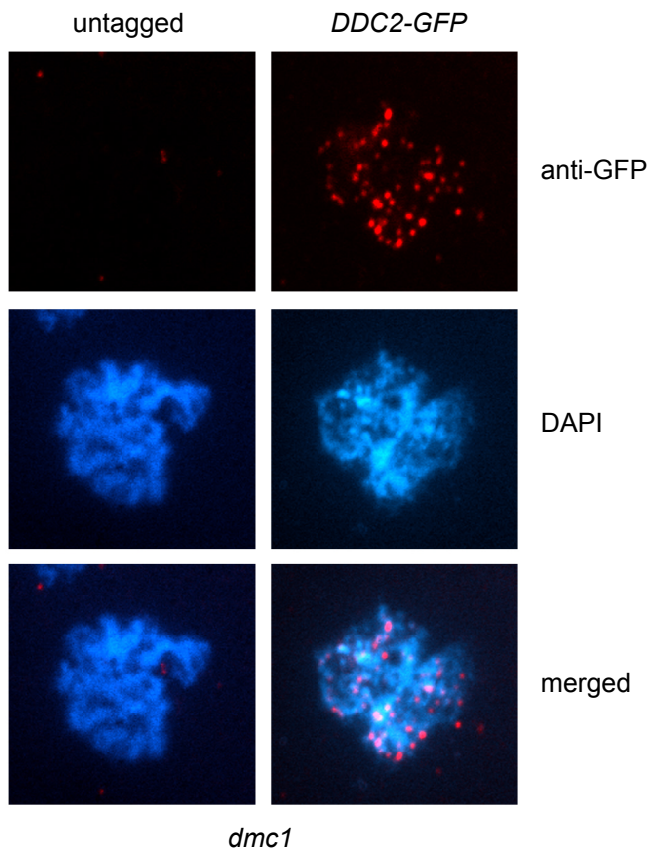

Supplement: jcs081711figs6.pdf [file jcs081711figs6.pdf]

**A**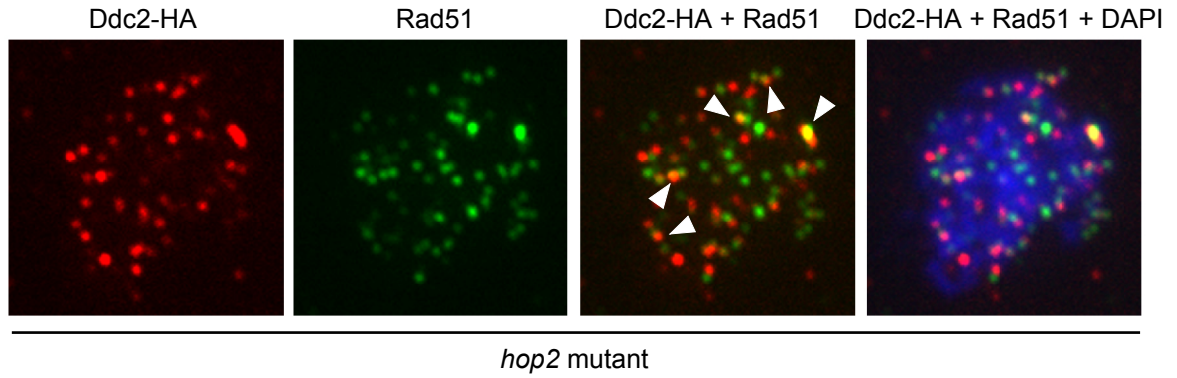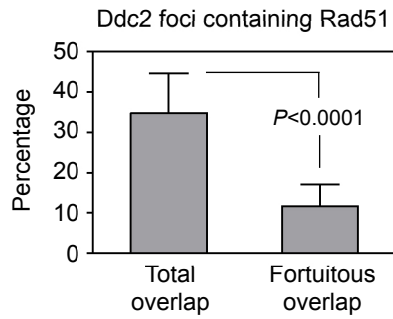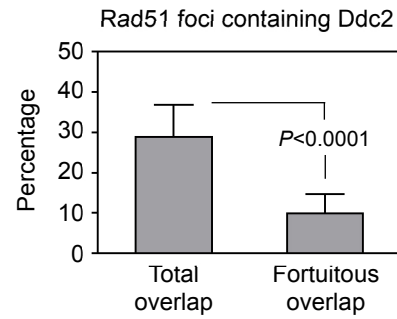**B**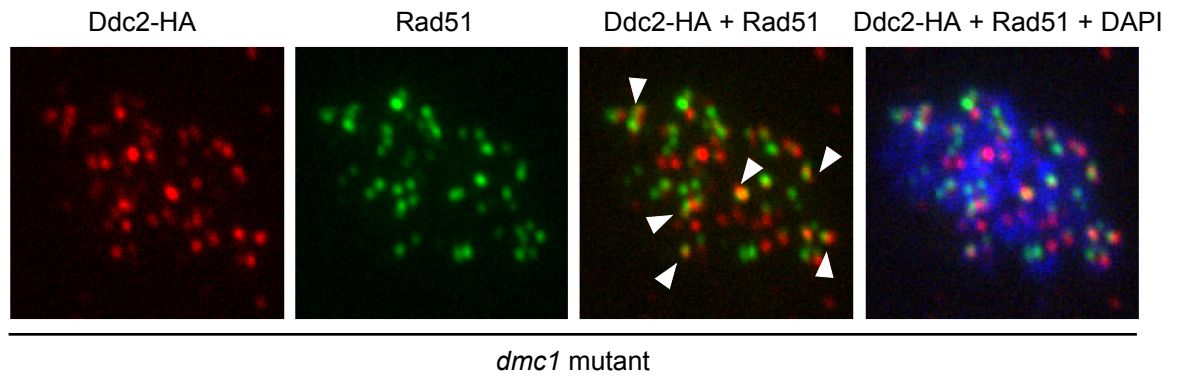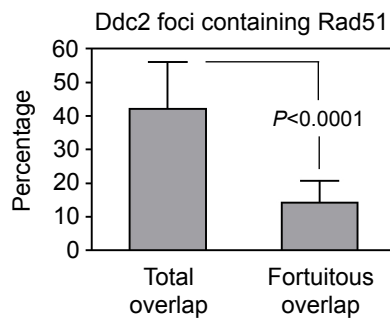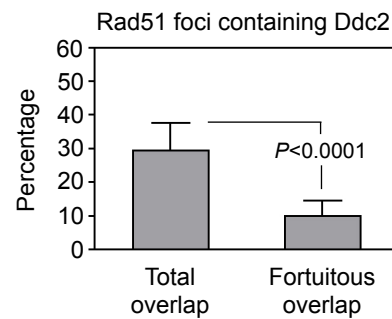

Supplement: jcs081711figs7.pdf [file jcs081711figs7.pdf]
